# Supplementary material
Source: PubMed Central journal article supplement (PMC2885907)

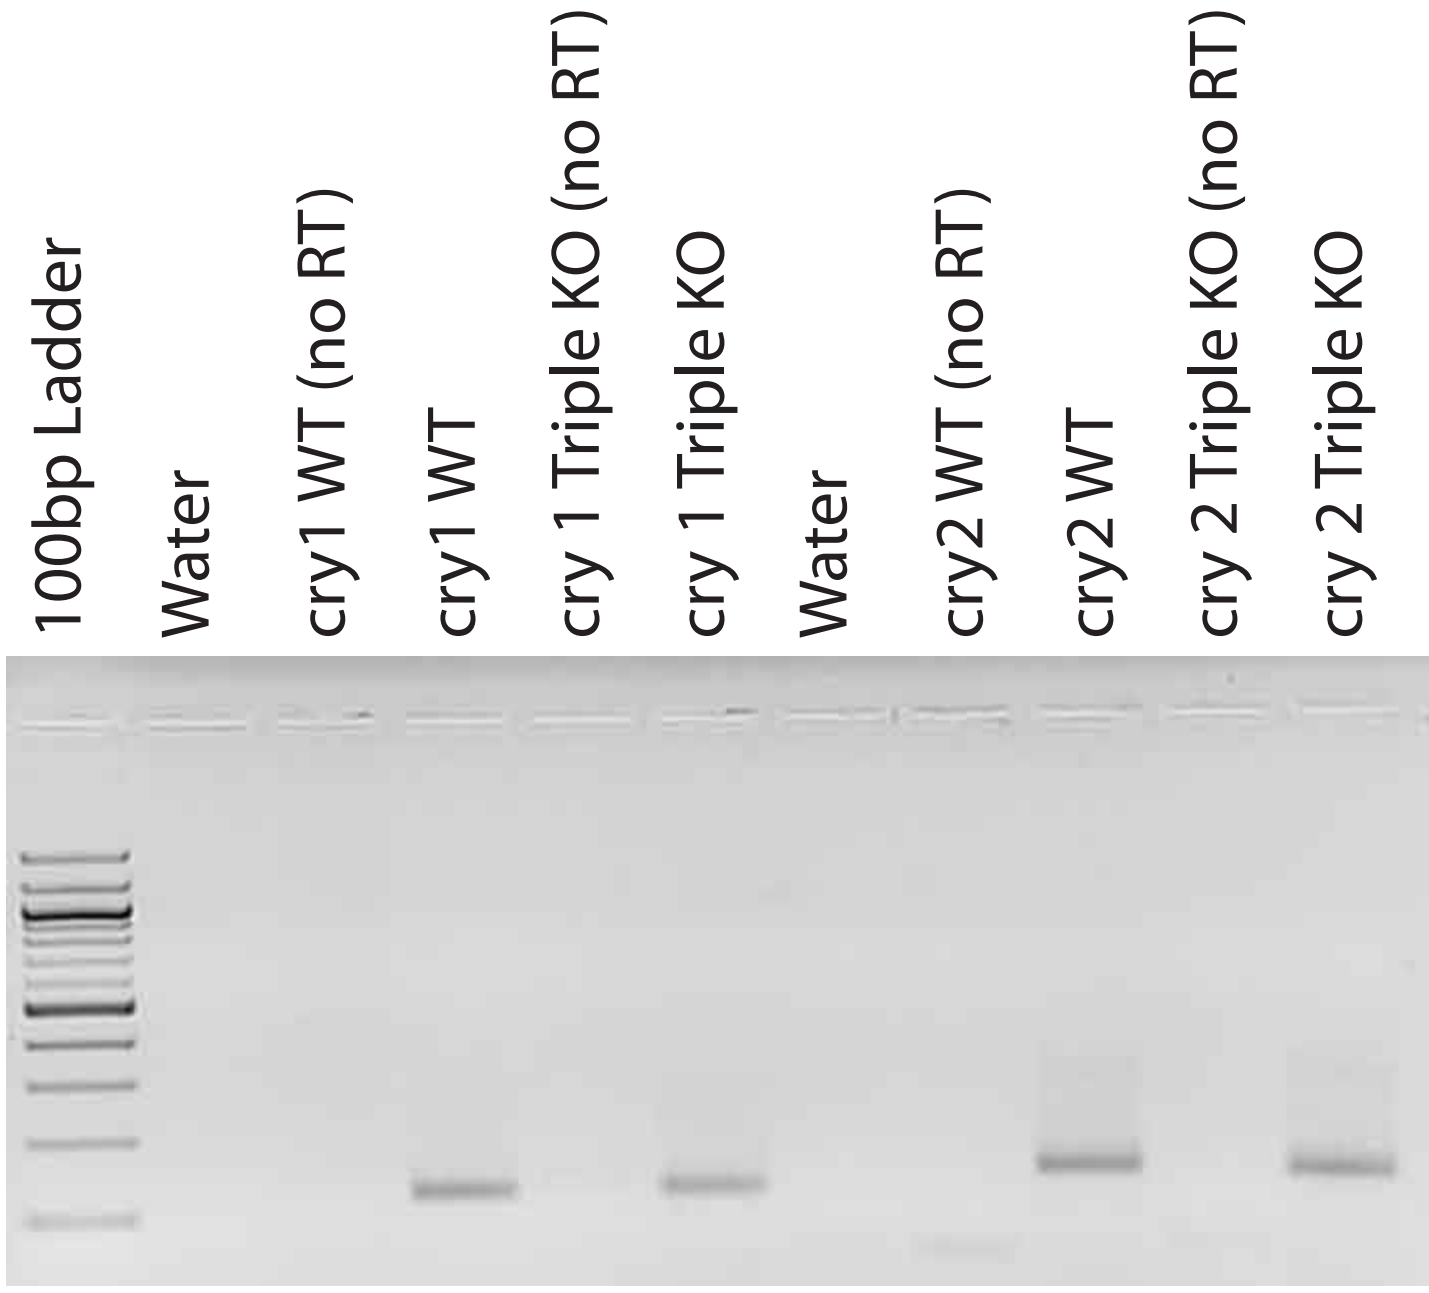

Figure SI1

Supplement: NIHMS204472-supplement-Fig_1.pdf [file NIHMS204472-supplement-Fig_1.pdf]
